# Supplementary material
Source: PubMed Central journal article supplement (PMC9724925)
Supplement: EIJ-D-20-00744_Kroon_SD.pdf [file EIJ-D-20-00744_Kroon_SD.pdf]

**Supplementary data**

**Supplementary Table 1. Univariate analysis on the presence of particles equal to or larger than 1,000  $\mu\text{m}$ .**

|                                       | <b>Particles <math>\geq 1,000 \mu\text{m}</math></b><br>OR (95% CI) | <b><i>p</i>-value</b> |
|---------------------------------------|---------------------------------------------------------------------|-----------------------|
| <b>Baseline characteristics</b>       |                                                                     |                       |
| Male                                  | 0.67 (0.41-1.09)                                                    | 0.11                  |
| Age, years                            | 0.99 (0.96-1.03)                                                    | 0.73                  |
| STS score, %                          | 0.97 (0.88-1.06)                                                    | 0.48                  |
| BMI, $\text{kg/m}^2$                  | 1.04 (0.99-1.10)                                                    | 0.12                  |
| Creatinine at baseline (umol/L)       | 0.997 (0.990-1.003)                                                 | 0.34                  |
| Hypertension                          | 1.05 (0.59-1.86)                                                    | 0.86                  |
| Hypercholesterolaemia                 | 0.90 (0.54-1.49)                                                    | 0.68                  |
| PAD                                   | 0.83 (0.50-1.37)                                                    | 0.46                  |
| Atrial fibrillation                   | 0.81 (0.47-1.38)                                                    | 0.43                  |
| History of stroke                     | 0.96 (0.43-2.15)                                                    | 0.93                  |
| History of TIA                        | 0.88 (0.41-1.89)                                                    | 0.75                  |
| Diabetes                              | 0.78 (0.45-1.33)                                                    | 0.36                  |
| Ischaemic heart disease               | 0.79 (0.48-1.31)                                                    | 0.36                  |
| Previous AVR/TAVI                     | 2.25 (0.86-5.90)                                                    | 0.099                 |
| Femoral access                        | 0.18 (0.02-2.04)                                                    | 0.17                  |
| Predilatation                         | 2.11 (1.03-4.32)                                                    | 0.04                  |
| Post-dilatation                       | 1.06 (0.59-1.89)                                                    | 0.86                  |
| Moderate/severe LVOT calcification    | 1.02 (0.55-1.87)                                                    | 0.96                  |
| Moderate/severe annulus calcification | 0.96 (0.33-2.77)                                                    | 0.94                  |

|                                               |                     |       |
|-----------------------------------------------|---------------------|-------|
| Aortic valve Agatston score (per 10 increase) | 1.001 (1.000-1.003) | 0.077 |
| (Functional) bicuspid valve                   | 3.00 (1.53-5.85)    | 0.001 |
| THV type used                                 |                     |       |
| SAPIEN 3                                      | 1.00 (reference)    | -     |
| Evolut R/PRO                                  | 1.74 (0.94-3.22)    | 0.077 |
| Lotus                                         | 2.45 (1.30-4.64)    | 0.006 |
| Use of repositioning*                         | 1.35 (0.77-2.39)    | 0.30  |

Results are displayed as OR (95% CI).

\* Repositioning OR 1.02 (0.56-1.88), p=0.94 as tested only in Evolut R/PRO and Lotus THV patients.

AVR: aortic valve replacement; BMI: body mass index; LVOT: left ventricular outflow tract; PAD: peripheral arterial disease; STS: Society of Thoracic Surgeons; TAVI: transcatheter aortic valve implantation; THV: transcatheter heart valve; TIA: transient ischaemic attack

**Supplementary Table 2. Univariate analysis on the presence of a greater than average amount of debris.**

|                                       | <b>More than average amount of material<br/>OR (95% CI)</b> | <b><i>p</i>-value</b> |
|---------------------------------------|-------------------------------------------------------------|-----------------------|
| <b>Baseline characteristics</b>       |                                                             |                       |
| Male                                  | 0.99 (0.57-1.71)                                            | 0.96                  |
| Age, years                            | 0.98 (0.94-1.01)                                            | 0.17                  |
| STS score, %                          | 0.99 (0.89-1.10)                                            | 0.85                  |
| BMI, kg/m <sup>2</sup>                | 1.02 (0.98-1.06)                                            | 0.34                  |
| Creatinine at baseline (umol/L)       | 0.994 (0.994-1.002)                                         | 0.15                  |
| Hypertension                          | 1.80 (0.90-3.63)                                            | 0.098                 |
| Hypercholesterolaemia                 | 0.63 (0.36-1.11)                                            | 0.11                  |
| PAD                                   | 1.13 (0.64-1.99)                                            | 0.68                  |
| Atrial fibrillation                   | 1.30 (0.73-2.33)                                            | 0.38                  |
| History of stroke                     | 0.30 (0.09-1.04)                                            | 0.06                  |
| History of TIA                        | 0.70 (0.27-1.80)                                            | 0.46                  |
| Diabetes                              | 0.84 (0.46-1.53)                                            | 0.57                  |
| Ischaemic heart disease               | 0.82 (0.47-1.44)                                            | 0.49                  |
| Previous AVR/TAVI                     | 1.06 (0.32-3.49)                                            | 0.93                  |
| Femoral access                        | 0.75 (0.07-8.42)                                            | 0.82                  |
| Predilatation                         | 1.26 (0.54-2.94)                                            | 0.59                  |
| Post-dilatation                       | 1.24 (0.68-2.28)                                            | 0.48                  |
| Moderate/severe LVOT calcification    | 1.02 (0.53-1.96)                                            | 0.96                  |
| Moderate/severe annulus calcification | 0.55 (0.19-1.60)                                            | 0.27                  |

|                                               |                     |       |
|-----------------------------------------------|---------------------|-------|
| Aortic valve Agatston score (per 10 increase) | 0.999 (0.997-1.001) | 0.44  |
| (Functional) bicuspid valve                   | 1.14 (0.53-2.46)    | 0.73  |
| THV type used                                 |                     |       |
| SAPIEN 3                                      | 1.00 (reference)    | -     |
| Evolut R/PRO                                  | 1.95 (1.03-3.70)    | 0.04  |
| Lotus                                         | 1.62 (0.72-3.63)    | 0.24  |
| Use of repositioning*                         | 2.81 (1.52-5.18)    | 0.001 |

Results are displayed as OR (95% CI).

\* Repositioning OR 2.32 (1.23-4.38), p=0.009 as tested only in Evolut R/PRO and Lotus THV patients.

AVR: aortic valve replacement; BMI: body mass index; LVOT: left ventricular outflow tract; PAD: peripheral arterial disease; STS: Society of Thoracic Surgeons; TAVI: transcatheter aortic valve implantation; THV: transcatheter heart valve; TIA: transient ischaemic attack
